# Supplementary material for: Zinc hexacyanoferrate with a highly reversible open framework for fast aqueous nickel-ion storage
Source: Royal Society of Chemistry journal article supplement (doi:10.1039/d2qi01171a), 2022-01-01
Supplement: d2qi01171a1.pdf [file d2qi01171a1.pdf]

## Supporting Information

### Zinc Hexacyanoferrate with Highly Reversible Open Framework for Fast Aqueous Nickel-Ion Storage

*Jichen Zhao<sup>1</sup>, Jiayi Xu<sup>1</sup>, Xikun Zhang<sup>1</sup>, Yiwen Liu, Chiwei Xu, Junwei Zhang, Haoxiang Yu, Lei Yan\*, Jie Shu\**

*School of Materials Science and Chemical Engineering, Ningbo University, Ningbo, Zhejiang, 315211, China*

<sup>1</sup> These authors contributed equally to this work.

\* Corresponding author: Jie Shu

E-mail: [shujie@nbu.edu.cn](mailto:shujie@nbu.edu.cn)

\* Corresponding author: Lei Yan

E-mail: [yanlei@nbu.edu.cn](mailto:yanlei@nbu.edu.cn)

$$I_p = av^b \quad (1)$$

$I_p$ : peak current(mA),  $v$ : scan rate ( $\text{mV s}^{-1}$ ),  $a$  and  $b$ : adjustable constants.

$$I_p = k_1v + k_2v^{\frac{1}{2}} \quad (2)$$

$I_p$ : peak current (mA),  $v$ : scan rate ( $\text{mV s}^{-1}$ ),  $k_1$  and  $k_2$ : adjustable constants.

$$D = \frac{0.5R^2T^2}{A^2n^4F^4C^2\sigma^2} \quad (3)$$

$D$ : diffusion coefficient,  $R$ : gas constant,  $T$ : temperature,  $A$ : electrode area,  $n$ : electrons transfer number,  $F$ : Faraday constant,  $C$ : concentration of  $\text{Ni}^{2+}$ ,  $\sigma$ : Warburg coefficient.

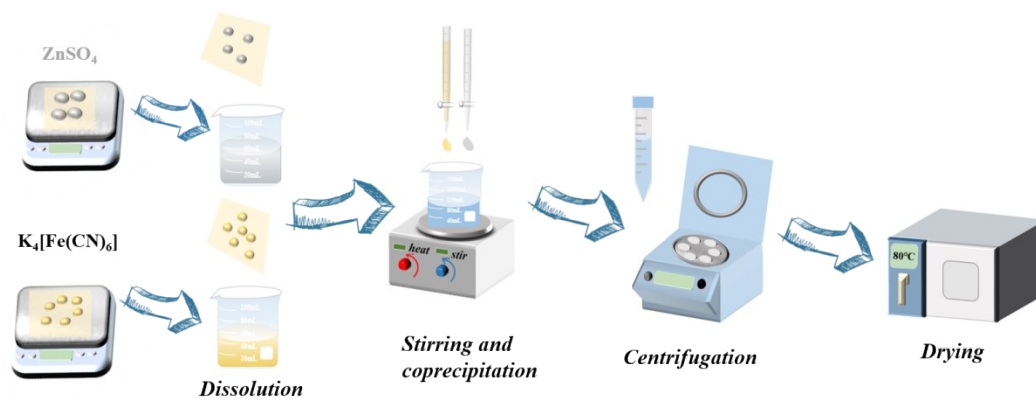

**Fig. S1.** Synthetic procedure of K-ZnHCF.

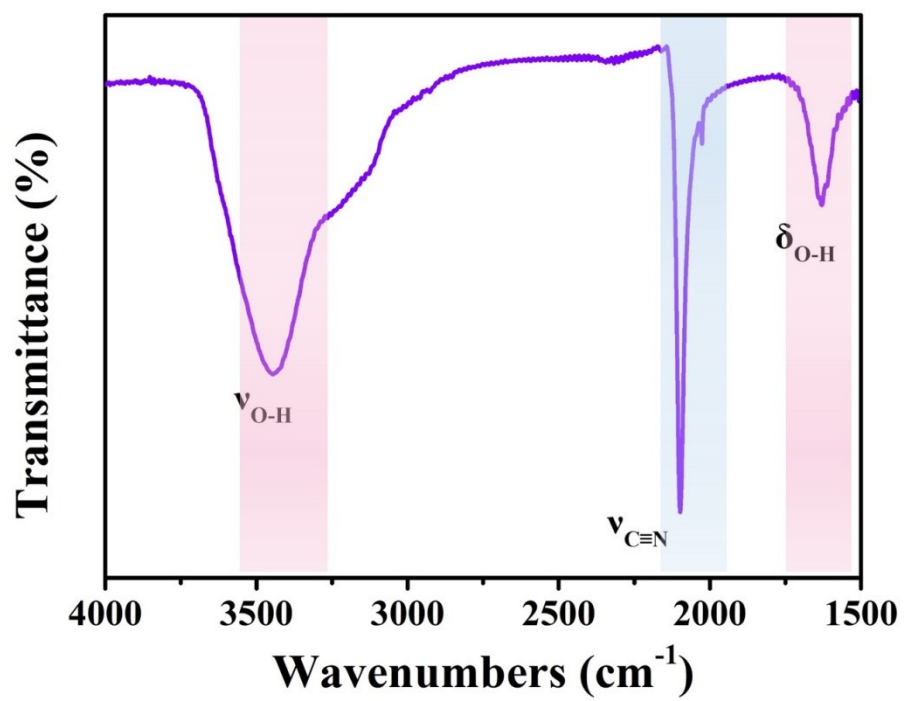

Fig. S2. FTIR spectrum of K-ZnHCF.

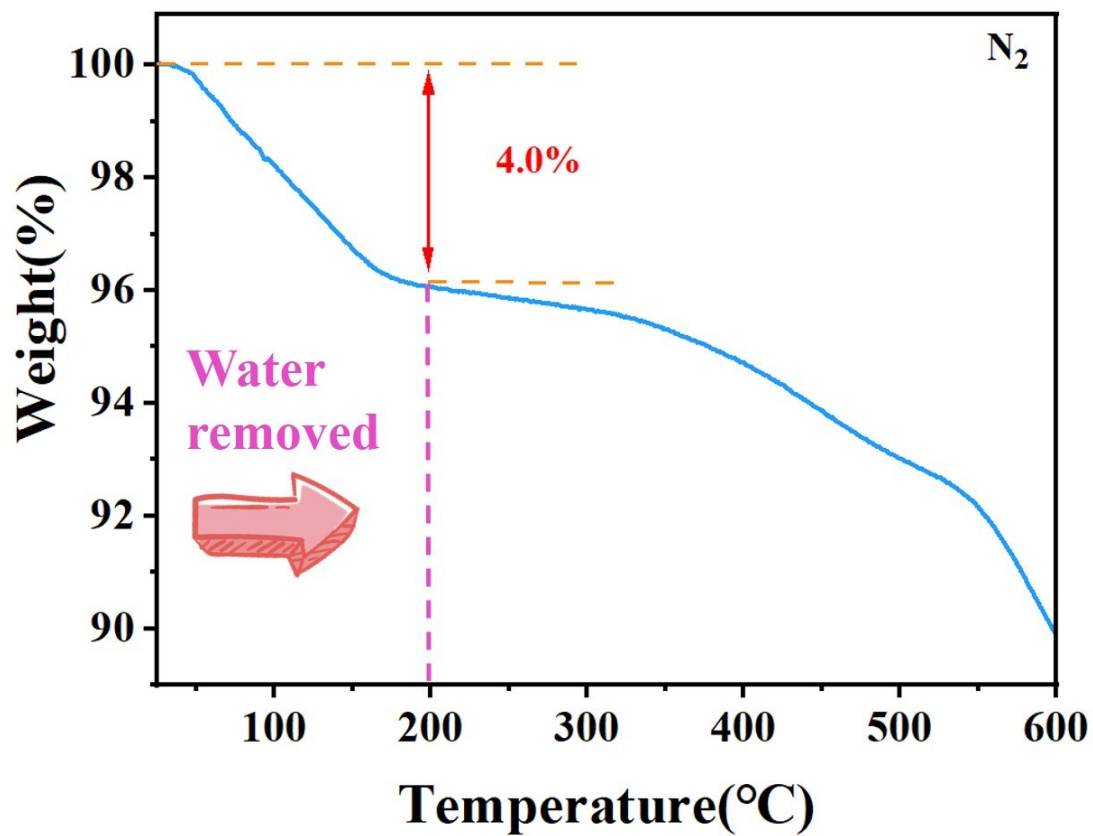

Fig. S3. TGA curve of K-ZnHCF from 25 to 600°C.

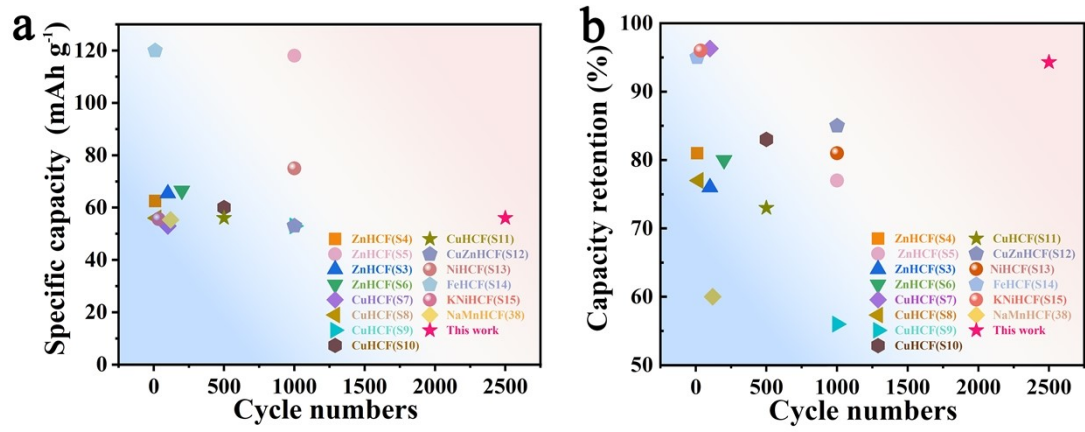

**Fig. S4.** Comparison of cycle performance between this work and PBAs-based zinc ions batteries. (a) Specific capacity. (b) Capacity retention.

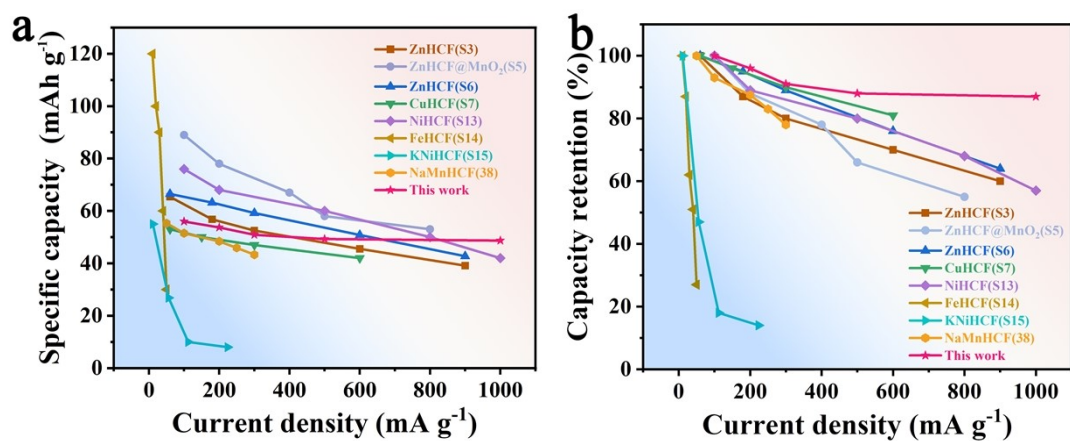

**Fig. S5.** Comparison of rate performance between this work and PBAs-based zinc ions batteries. (a) Specific capacity. (b) Capacity retention.

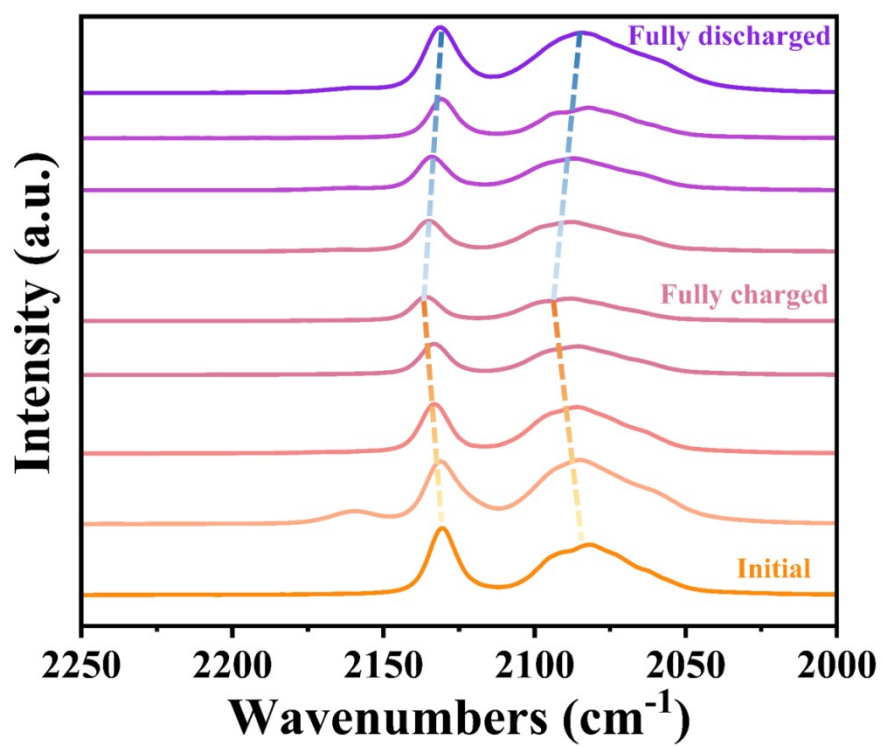

**Fig. S6.** Ex-situ Raman spectra of K-ZnHCF during electrochemical cycle.



**Table S1.** Rietveld refinement data obtained for K-ZnHCF material.

| Site                                                                                       | Atom | x       | y        | z       | Occupancy |
|--------------------------------------------------------------------------------------------|------|---------|----------|---------|-----------|
| <i>a = b = 12.53676 Å, c = 32.09520 Å, R<sub>p</sub> = 9.77 %, R<sub>wp</sub> = 12.3 %</i> |      |         |          |         |           |
| 36f                                                                                        | C(1) | 0.14089 | -0.02186 | 0.17739 | 1.00      |
| 36f                                                                                        | C(2) | 0.54215 | 0.23880  | 0.23880 | 1.00      |
| 36f                                                                                        | N(1) | 0.18763 | -0.02742 | 0.20583 | 1.00      |
| 36f                                                                                        | N(2) | 0.44938 | 0.14714  | 0.23903 | 1.00      |
| 12c                                                                                        | Fe   | 0.00000 | 0.00000  | 0.14821 | 0.333     |
| 18e                                                                                        | Zn   | 0.28703 | 0.00000  | 0.25000 | 0.500     |
| 36f                                                                                        | K    | 0.55863 | 0.35284  | 0.30771 | 0.300     |
| 36f                                                                                        | O(1) | 0.45040 | 0.26570  | 0.31724 | 0.170     |
| 36f                                                                                        | O(2) | 0.47441 | 0.29932  | 0.31775 | 0.150     |
| 36f                                                                                        | O(3) | 0.51967 | 0.40351  | 0.31127 | 0.280     |
| 36f                                                                                        | O(4) | 0.41772 | 0.36038  | 0.29450 | 0.560     |
| 36f                                                                                        | O(5) | 0.33359 | 0.32381  | 0.27443 | 0.400     |

**Table S2.** The comparison of electrochemical performance between this work and recently reported aqueous batteries.

| Material                                                                 | Charge carrier   | Reversible capacity     | Voltage polarization | Cycling performance | Ref.      |
|--------------------------------------------------------------------------|------------------|-------------------------|----------------------|---------------------|-----------|
| Na <sub>2</sub> Co[Fe(CN) <sub>6</sub> ]                                 | Na <sup>+</sup>  | 150mAh g <sup>-1</sup>  | 0.15V                | 90%/200/100         | [S1]      |
| Fe <sub>4</sub> [Fe(CN) <sub>6</sub> ] <sub>3</sub> ·3.4H <sub>2</sub> O | K <sup>+</sup>   | 67mAh g <sup>-1</sup>   | 0.16V                | 82.4%/500/100       | [33]      |
| FeNiHCF                                                                  | Na <sup>+</sup>  | 106mAh g <sup>-1</sup>  | 0.08V                | 96%/100/10          | [S2]      |
| Zn <sub>3</sub> [Fe(CN) <sub>6</sub> ] <sub>2</sub>                      | Zn <sup>2+</sup> | 52.5mAh g <sup>-1</sup> | 0.33V                | 81%/100/300         | [S3]      |
| K-ZnHCF                                                                  | Ni <sup>2+</sup> | 56.2mAh g <sup>-1</sup> | 0.06V                | 96%/2500/100        | This work |

The cycling performance is summarized as capacity retention/cycle number/current density (mA g<sup>-1</sup>).

**Table S3.** The comparison of electrochemical performance between this work and recently reported PBAs-based Zn ions batteries.

| Materials              | Electrolyte                         | Capacity retention (%) | Cycle numbers | Current density (mA·g <sup>-1</sup> ) | Specific capacity (mAh g <sup>-1</sup> ) | Voltage range (V)                   | Ref. |
|------------------------|-------------------------------------|------------------------|---------------|---------------------------------------|------------------------------------------|-------------------------------------|------|
| ZnHCF                  | 1 M ZnSO <sub>4</sub>               | 76%                    | 100           | 300                                   | 65.4                                     | 0.8–2.0 (vs. Zn <sup>2+</sup> /Zn)  | S3   |
| ZnHCF                  | 0.1 M ZnSO <sub>4</sub>             | 81%                    | 10            | 40                                    | 62.5                                     | 1.2–2.05 (vs. Zn <sup>2+</sup> /Zn) | S4   |
| ZnHCF@MnO <sub>2</sub> | 0.5 M ZnSO <sub>4</sub>             | 77%                    | 1000          | 500                                   | 118                                      | 1.4–1.9 (vs. Zn <sup>2+</sup> /Zn)  | S5   |
| ZnHCF                  | 3 M ZnSO <sub>4</sub>               | 80%                    | 200           | 300                                   | 66.5                                     | 0.8–2.0 (vs. Zn <sup>2+</sup> /Zn)  | S6   |
| CuHCF                  | 0.02 ZnSO <sub>4</sub>              | 96.3%                  | 100           | 60                                    | 53                                       | 0.6–1.3 (vs. SHE)                   | S7   |
| CuHCF                  | 1 M ZnSO <sub>4</sub>               | 77%                    | 20            | 20                                    | 56                                       | 0–1.1 (vs. SCE)                     | S8   |
| CuHCF                  | 0.1 M ZnSO <sub>4</sub>             | 56%                    | 1000          | 50                                    | 53                                       | 0.2–1.1 (vs. Ag/AgCl)               | S9   |
| CuHCF                  | 1 M Na <sub>2</sub> SO <sub>4</sub> | 83%                    | 500           | 300                                   | 60                                       | 1.4–2.1 (vs. Zn <sup>2+</sup> /Zn)  | S10  |
| CuHCF                  | 2 M NaClO <sub>4</sub>              | 73%                    | 500           | 300                                   | 56                                       | 0.4–1.3 (vs. SHE)                   | S11  |
| CuZnHCF                | 0.02 M ZnSO <sub>4</sub>            | 85%                    | 1000          | 85                                    | 53                                       | 0.2–1.1 (vs. Ag/AgCl)               | S12  |

|         |                                                                     |       |      |     |      |                                    |           |
|---------|---------------------------------------------------------------------|-------|------|-----|------|------------------------------------|-----------|
| NiHCF   | 0.5 M Na <sub>2</sub> SO <sub>4</sub> +<br>0.05 M ZnSO <sub>4</sub> | 81%   | 1000 | 500 | 75   | 0.9–1.9 (vs. Zn <sup>2+</sup> /Zn) | S13       |
| FeHCF   | 1 M Zn(OAc) <sub>2</sub>                                            | 95%   | 10   | 10  | 120  | 0.8–2.0 (vs. Zn <sup>2+</sup> /Zn) | S14       |
| KNiHCF  | 0.5 M Zn(ClO <sub>4</sub> ) <sub>2</sub>                            | 96%   | 35   | 56  | 55.6 | 0.7–1.8 (vs. Zn <sup>2+</sup> /Zn) | S15       |
| NaMnHCF | 1 M ZnSO <sub>4</sub>                                               | 60%   | 120  | 50  | 55.3 | 0-1 (vs. Ag/AgCl)                  | 38        |
| K-ZnHCF | 0.5 M Ni(Ac) <sub>2</sub>                                           | 94.3% | 2500 | 100 | 56   | -0.5-0.9 (vs. Ag/AgCl)             | This work |

---

## Reference

- S1 X.Y. Wu, C.H. Wu, C.X. Wei, L. Hu, J.F. Qian, Y.L. Cao, X.P. Ai, J.L. Wang, H.X. Yang, Highly crystallized  $\text{Na}_2\text{CoFe}(\text{CN})_6$  with suppressed lattice defects as superior cathode material for sodium-ion batteries, *ACS Appl. Mater. Interfaces*, 2016, **8**, 5393-5399.
- S2 S.L. Yu, Y. Li, Y.H. Lu, B. Xu, Q.T. Wang, M. Yan, Y.Z. Jiang, A promising cathode material of sodium-iron nickel hexacyanoferrate for sodium ion batteries, *J. Power Sources*, 2015, **275**, 45-49.
- S3 L.Y. Zhang, L. Chen, X.F. Zhou, Z.P. Liu, Towards high-voltage aqueous metal-ion batteries beyond 1.5 V: the zinc/zinc hexacyanoferrate system, *Adv. Energy Mater.*, 2015, **5**, 1400930.
- S4 B. Tang, L. Shan, S. Liang, J. Zhou, Issues and opportunities facing aqueous zinc-ion batteries, *Energy Environ. Sci.*, 2019, **12**, 3288-3304.
- S5 K. Lu, B. Song, Y. Zhang, H. Ma, J. Zhang, Encapsulation of zinc hexacyanoferrate nanocubes with manganese oxide nanosheets for high-performance rechargeable zinc ion batteries, *J. Mater. Chem. A*, 2017, **5**, 23628-23633.
- S6 L. Zhang, L. Chen, X. Zhou, Z. Liu, Morphology-dependent electrochemical performance of zinc hexacyanoferrate cathode for zinc-ion battery, *Sci. Rep.*, 2015, **5**, 18265.
- S7 R. Trócoli, F. La Mantia, An aqueous zinc-ion battery based on copper hexacyanoferrate, *ChemSusChem*, 2015, **8**, 481-485.
- S8 Z. Jia, B. Wang, Y. Wang, Copper hexacyanoferrate with a well-defined open framework as a positive electrode for aqueous zinc ion batteries, *Mater. Chem. Phys.*, 2015, **149**, 601-606.

- S9 J. Lim, G. Kasiri, R. Sahu, K. Schweinar, K. Hengge, D. Raabe, F. La Mantia, C. Scheu, Irreversible structural changes of copper hexacyanoferrate used as a cathode in Zn-ion batteries, *Chem. Eur. J.*, 2019, **26**, 4917-4922.
- S10 T. Gupta, A. Kim, S. Phadke, S. Biswas, T. Luong, B. J. Hertzberg, M. Chamoun, K. Evans-Lutterodt, D. A. Steingart, Improving the cycle life of a high-rate, high-potential aqueous dual-ion battery using hyper-dendritic zinc and copper hexacyanoferrate, *J. Power Sources*, 2016, **305**, 22-29.
- S11 R. Trócoli, G. Kasiri, F. La Mantia, Phase transformation of copper hexacyanoferrate (KCuFe(CN)<sub>6</sub>) during zinc insertion: effect of Co-ion intercalation, *J. Power Sources*, 2018, **400**, 167-171.
- S12 G. Kasiri, J. Glenneberg, A. B. Hashemi, R. Kun, F. La Mantia, Mixed copper-zinc hexacyanoferrates as cathode materials for aqueous zinc-ion batteries, *Energy Storage Mater.*, 2019, **16**, 360-369.
- S13 K. Lu, B. Song, J. Zhang, H. Ma, A rechargeable Na-Zn hybrid aqueous battery fabricated with nickel hexacyanoferrate and nanostructured zinc, *J. Power Sources*, 2016, **321**, 257-263.
- S14 Z. Liu, G. Pulletikurthi, F. Endres, A Prussian blue/zinc secondary battery with a bio-ionic liquid-water mixture as electrolyte, *ACS Appl. Mater. Interfaces*, 2016, **8**, 12158-12164.
- S15 M. S. Chae, J. W. Heo, H. H. Kwak, H. Lee, S. T. Hong, Organic electrolyte-based rechargeable zinc-ion batteries using potassium nickel hexacyanoferrate as a cathode material, *J. Power Sources*, 2017, **337**, 204-211.
